# Supplementary material for: Curcumin-based-fluorescent probes targeting ALDH1A3 as a promising tool for glioblastoma precision surgery and early diagnosis
Source: Research Square preprint supplement (doi:10.21203/rs.3.rs-567295/v1), 2021-06-08
Supplement: Supplementary file 1 [file 71852cf3f275185d44fe5009.docx]

**Curcumin-based-fluorescent probes targeting ALDH1A3 as a promising tool for glioblastoma precision surgery and early diagnosis**

Edoardo L. M. Gelardia,1, Diego Caprioglioa,1, Giorgia Colomboa, Daniele Mazzolettia, Daiana Mattoteiaa, Stefano Salamonea, Davide M. Ferrarisa,h, Eleonora Aronicab,c, Giulia Natod,e, Annalisa Buffof,e, Menico Rizzia, Lorenzo Magrassig,h, Alberto Minassia,i* & Silvia Garavagliaa,*.

a Department of Scienze del Farmaco, University of Piemonte Orientale, Via Bovio, 6, Novara, 28100, Italy

b Department of (Neuro)Pathology, Amsterdam UMC, University of Amsterdam, The Netherlands

c Stichting Epilepsie Instellingen Nederland (SEIN), Heemstede, The Netherlands

d Department of Life Sciences and System Biology University of Turin, Via accademia Albertina 13,Turin, Italy

e Neuroscience Institute Cavalieri Ottolenghi (NICO), 10043 Orbassano, Torino, Italy.

f Department of Neuroscience Rita Levi Montalcini, University of Turin, Via Cherasco 15, Torino, Italy.

g Neurosurgery, Department of Clinical, Surgical, Diagnostic and Pediatric Science, University of Pavia, Foundation IRCCS Policlinico San Matteo, Pavia, 27100, Italy.

h Istituto Di Genetica Molecolare IGM-CNR, via Abbiategrasso 207, 27100 Pavia, Italy.

i PlantaChem srls, via Canobio 4/6, 28100 Novara, Italy

h IXTAL srl, via Bovio 6, 28100, Novara, Italy

Correspondence: silvia.garavaglia@uniupo.it; alberto.minassi@uniupo.it

1 These authors contributed equally to the work

2 Co-last authors with Prof. Silvia Garavaglia


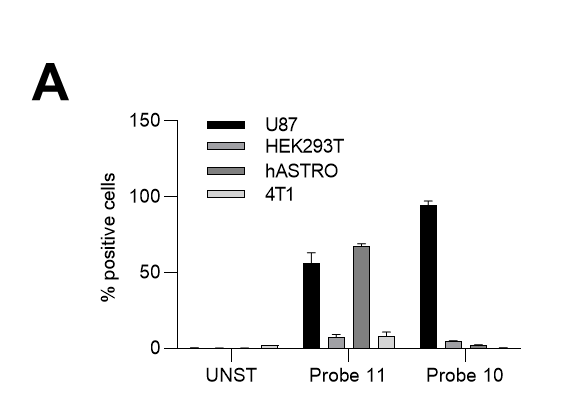


**Figure Supplementary S1**: Flow cytometry analysis of probe 10 and probe 11 on Human U87MG ALDH1A3+ glioblastoma cells, HEK293T ALDH1A2+ cell line, human foetal astrocytes (hASTRO) ALDH1A1+ cell line and 4T1 mammary carcinoma as triple negative ALDH1A subfamily.
